# Supplementary material for: Charge transfer dynamics in a singlet fission organic molecule and organometal perovskite bilayer structure
Source: Royal Society of Chemistry journal article supplement (doi:10.1039/c9ta11022d), 2020-01-01
Supplement: c9ta11022d1.pdf [file c9ta11022d1.pdf]

## Supplementary Information:

### Charge transfer dynamics in singlet fission organic molecule and organometal perovskite bilayer structure

Deqiang Guo,<sup>a</sup> Lin Ma,<sup>\*a</sup> Zilin Zhou,<sup>a</sup> Dabin Lin,<sup>a</sup> Cheng Wang,<sup>a</sup> Xin Zhao,<sup>a</sup> Fangteng Zhang,<sup>†</sup>  
Jiahua Zhang<sup>b</sup> and Zhaogang Nie<sup>\*a</sup>

<sup>a</sup>*School of Physics and Optoelectronic Engineering, Guangdong University of Technology, Guangzhou, China*

<sup>b</sup>*State Key Laboratory of Luminescence and Applications, CIOMP, Chinese Academy of Sciences, Changchun, China*

*\*Email:* malin@gdut.edu.cn; zgnie@gdut.edu.cn

The TA decay traces were fitted using a convolution from the autocorrelation trace with a four-exponential differential equation (eq S3). The obtained negative  $A_0$  represents the existence of a rise component  $\tau_0$ .

$$\frac{d(\Delta A)}{dt} = -A_0 e^{-t/\tau_0} - A_1 e^{-t/\tau_1} - A_2 e^{-t/\tau_2} - A_3 e^{-t/\tau_3} \quad (\text{S1})$$

Table S1. 800 nm excitation TA kinetics fitting parameters.

| Sample                                | $\lambda_{\text{probe}}$<br>(nm) | $\tau_0$ , ps<br>(rise) | $A_0$ | $\tau_1$ ,<br>ps | $A_1$ | $\tau_2$ , ps   | $A_2$ | $\tau_3$ , ps     | $A_3$ |
|---------------------------------------|----------------------------------|-------------------------|-------|------------------|-------|-----------------|-------|-------------------|-------|
| MAPbI <sub>3</sub>                    | 750                              | 0.47<br>$\pm 0.03$      | -44%  | 27<br>$\pm 9$    | 15%   | 200<br>$\pm 42$ | 46%   | 1900<br>$\pm 450$ | 39%   |
| TIPS-pentacene/<br>MAPbI <sub>3</sub> | 750                              | 0.56<br>$\pm 0.03$      | -70%  | 17<br>$\pm 4$    | 14%   | 200<br>$\pm 25$ | 45%   | 1500<br>$\pm 230$ | 41%   |

Table S2. 650 nm excitation TA kinetics fitting parameters.

| Sample                                    | $\lambda_{\text{probe}}$<br>(nm) | $\tau_0$ , ps<br>(rise) | $A_0$  | $\tau_1$ , ps    | $A_1$ | $\tau_2$ , ps   | $A_2$ | $\tau_3$ , ps     | $A_3$ |
|-------------------------------------------|----------------------------------|-------------------------|--------|------------------|-------|-----------------|-------|-------------------|-------|
| MAPbI <sub>3</sub>                        | 735 nm                           | 0.8<br>$\pm 0.1$        | -19.1% | 27<br>$\pm 3$    | 60.2% | 150<br>$\pm 50$ | 31%   | 1200<br>$\pm 520$ | 11.6% |
| TIPS-<br>pentacene                        | 530nm                            | 0.69<br>$\pm 0.04$      | -34.7% | 44<br>$\pm 8$    | 33.1% | 220<br>$\pm 79$ | 36.4% | 1400<br>$\pm 390$ | 30.6% |
|                                           | 900 nm                           | --                      | --     | 6<br>$\pm 1$     | 13%   | 81<br>$\pm 7$   | 44.9% | 950<br>$\pm 80$   | 42.1% |
| TIPS-<br>pentacene<br>/MAPbI <sub>3</sub> | 735nm                            | 1.49<br>$\pm 0.04$      | -38.5% | 37<br>$\pm 2$    | 56.4% | 200<br>$\pm 43$ | 29.1% | 1400<br>$\pm 390$ | 14.5% |
|                                           | 530nm                            | 0.41<br>$\pm 0.03$      | -32.1% | 18<br>$\pm 2$    | 31%   | 150<br>$\pm 18$ | 41.7% | 1400<br>$\pm 220$ | 27.4% |
|                                           | 900 nm                           | --                      | --     | 1.5<br>$\pm 0.1$ | 32.1% | 31 $\pm 3$      | 32.1% | 570<br>$\pm 40$   | 35.8% |

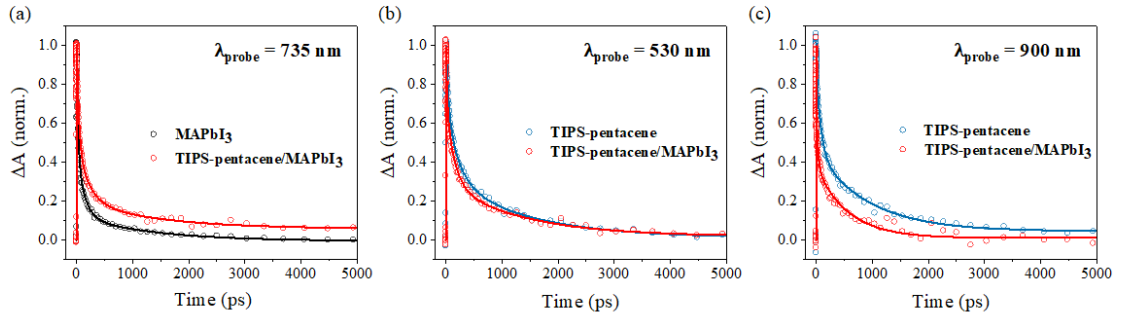

**Figure S1.** (a)-(c) Normalized transient kinetics of MAPbI<sub>3</sub> (black), TIPS-pentacene (blue) and TIPS-pentacene/MAPbI<sub>3</sub> bilayer (red) at different probe wavelengths in 5 ns window.

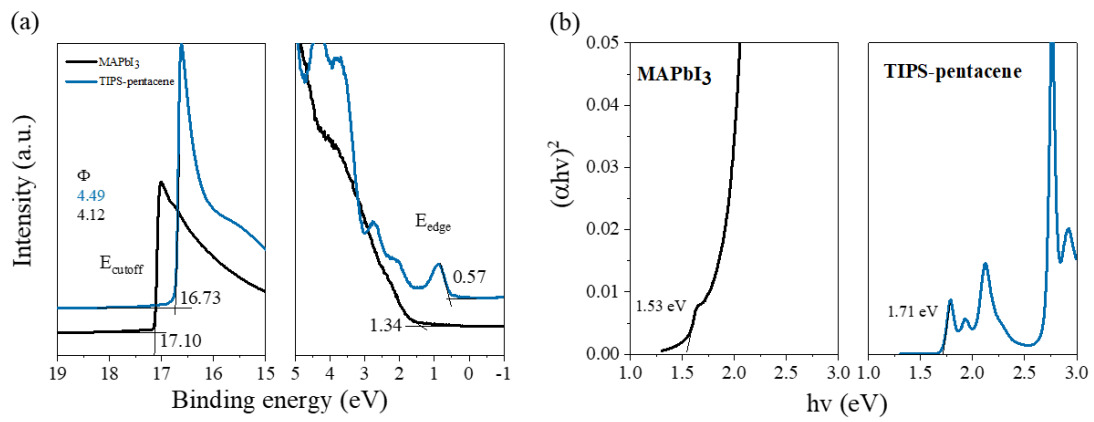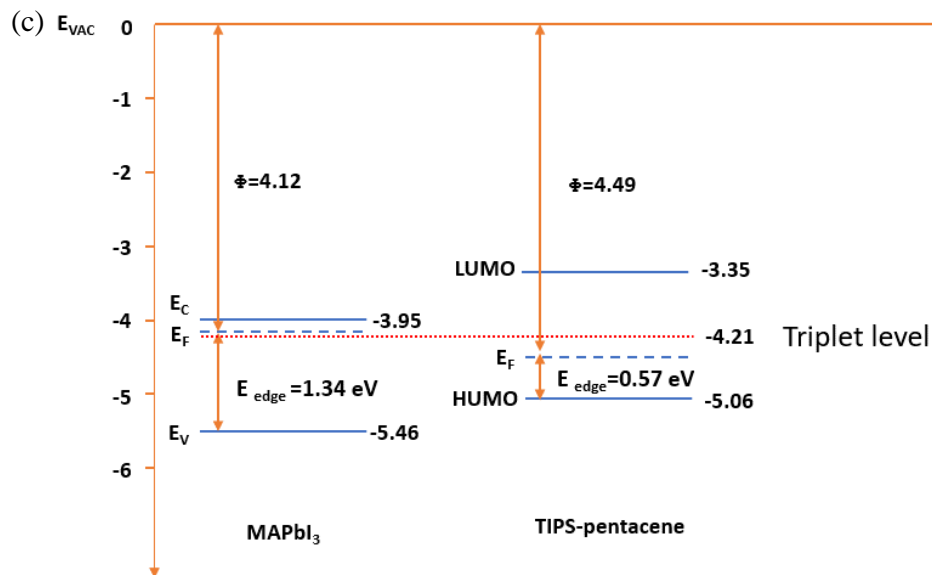

**Figure S2.** (a) UPS spectra of TIPS-pentacene and MAPbI<sub>3</sub> film. (b)  $(\alpha hv)^2$ - $hv$  curves of TIPS-pentacene and MAPbI<sub>3</sub> film. (c) Energy level diagram of MAPbI<sub>3</sub> and TIPS-pentacene film.

Ultraviolet photoelectron spectroscopy (UPS) measurements were carried out to determine the energies of valence band maximum ( $E_{VBM}$ ) and highest occupied molecular orbital ( $E_{HOMO}$ ) of MAPbI<sub>3</sub> and TIPS-pentacene films, respectively. As shown in Figure S2(a), according to the linear extrapolating method<sup>1</sup>, the  $E_{cutoff}$  of the MAPbI<sub>3</sub> and TIPS-pentacene films were 17.10 and 16.73 eV, the  $E_{edge}$  of MAPbI<sub>3</sub> and TIPS-pentacene films were 1.34 and 0.57 eV. The work functions ( $\Phi$ ) of MAPbI<sub>3</sub> and TIPS-pentacene films were determined to be 4.12 and 4.49 eV (referenced to vacuum level) correspondingly, by using eq S2.<sup>2</sup> The  $E_{VBM}$  of MAPbI<sub>3</sub> and  $E_{HOMO}$  of TIPS-pentacene film were calculated to be the -5.46 and -5.06 eV (vs vacuum) respectively, by using eq (S3).<sup>2</sup>

$$\Phi = h\nu - E_{cutoff} \quad (S2)$$

$$E_{VBM} = E_{edge} + \Phi \quad (S3)$$

As shown in Figure S2(b), band gap energies of MAPbI<sub>3</sub> and TIPS-pentacene films were determined to be 1.53 and 1.71 eV (versus vacuum) respectively from the Tacu ( $(\alpha h\nu)^2 - h\nu$ ) plots.<sup>3,4</sup> The energies of conduction band minimum ( $E_{CBM}$ ) and lowest unoccupied molecular orbital ( $E_{LUMO}$ ) of MAPbI<sub>3</sub> and TIPS-pentacene films were determined to be -3.95 and -3.35 eV respectively, calculated by adding corresponding optical band gap to the  $E_{VBM}$  or  $E_{HOMO}$ . The obtained energy level diagram of MAPbI<sub>3</sub> and TIPS-pentacene films were presented in Figure S3.

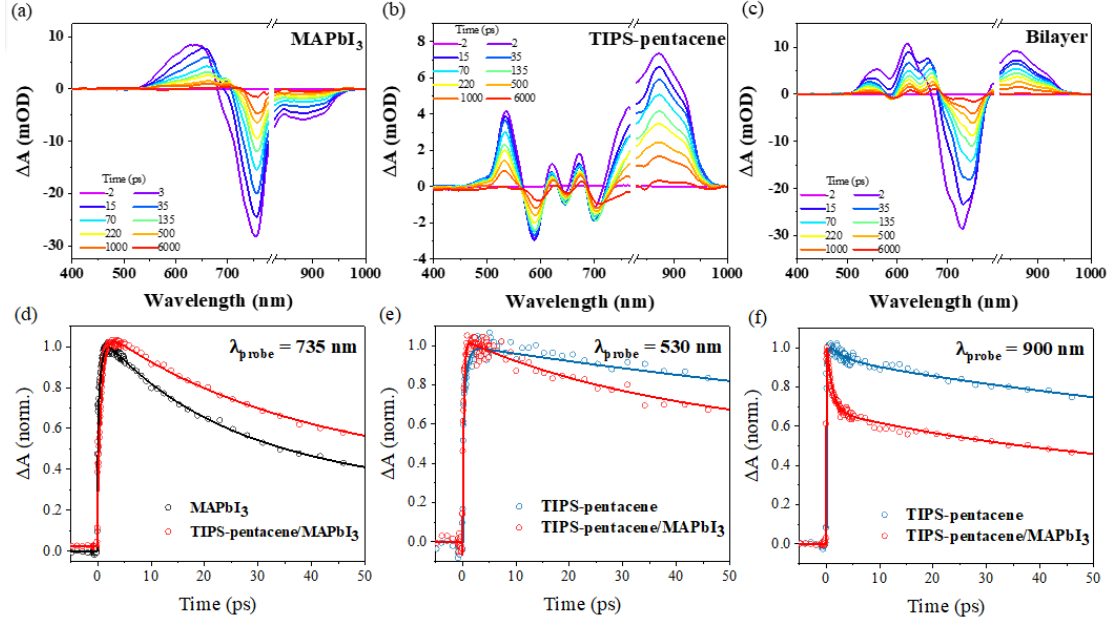

**Figure S3.** Broadband excitation transient absorption spectra of (a) MAPbI<sub>3</sub>, (b) TIPS-pentacene and (c) TIPS-pentacene/MAPbI<sub>3</sub> bilayer films at different delay times. (d)-(f) Normalized transient kinetics of MAPbI<sub>3</sub> (black), TIPS-pentacene (blue) and TIPS-pentacene/MAPbI<sub>3</sub> bilayer (red) at different probe wavelengths.

Table S3. Broadband excitation TA kinetics fitting parameters.

| Sample                                    | $\lambda_{\text{probe}}$<br>(nm) | $\tau_0$ , ps<br>(rise) | $A_0$  | $\tau_1$ , ps | $A_1$ | $\tau_2$ , ps | $A_2$ | $\tau_3$ , ps | $A_3$ |
|-------------------------------------------|----------------------------------|-------------------------|--------|---------------|-------|---------------|-------|---------------|-------|
| MAPbI <sub>3</sub>                        | 735                              | 0.62<br>±0.02           | -42.1% | 19<br>±1      | 51.2% | 90<br>±20     | 34.6% | 760<br>±170   | 14.2% |
| TIPS-<br>pentacene                        | 530                              | 0.6<br>±0.1             | -33.3% | 140<br>±30    | 54.8% | 1200<br>±470  | 45.2% |               |       |
|                                           | 900                              | --                      | --     | 43<br>±9      | 26.7% | 290<br>±90    | 42.7% | 1900<br>±900  | 30.6% |
| TIPS-<br>pentacene/<br>MAPbI <sub>3</sub> | 735                              | 0.73<br>±0.02           | -88.5% | 32<br>±3      | 55.9% | 200<br>±60    | 32.3% | 1700<br>±1000 | 11.8% |
|                                           | 530                              | 0.21<br>±0.01           | -100%  | 34<br>±4      | 32.4% | 480<br>±50    | 41.2% | >10ns         | 26.5% |
|                                           | 900                              | --                      | --     | 1.08<br>±0.04 | 35.5% | 50<br>±3      | 30.3% | 770<br>±50    | 34.2% |

Table S4. TCSPC data fitting parameters.

| Sample                                | $\tau_1$ , ns | $A_1$ | $\tau_2$ , ns | $A_2$ | $\tau_{average}$ , ns |
|---------------------------------------|---------------|-------|---------------|-------|-----------------------|
| MAPbI <sub>3</sub>                    | 3.6±0.05      | 70.7% | 94±1          | 29.3% | 28.3                  |
| TIPS-pentacene/<br>MAPbI <sub>3</sub> | 3.51±0.05     | 83.1% | 38±0.8        | 16.9% | 9.3                   |

The time-resolved PL traces were fitted using a convolution from the instrument response function (IRF) with a two-exponential differential equation (eq S1), and the average PL lifetimes were obtained from eq (S2), where  $\tau_i$  represents the time component and  $A_i$  represents the amplitude.

$$\frac{dI}{dt} = -A_1 e^{-t/\tau_1} - A_2 e^{-t/\tau_2} \quad (S4)$$

$$\tau_{average} = \frac{A_1 \tau_1 + A_2 \tau_2}{A_1 + A_2} \quad (S5)$$

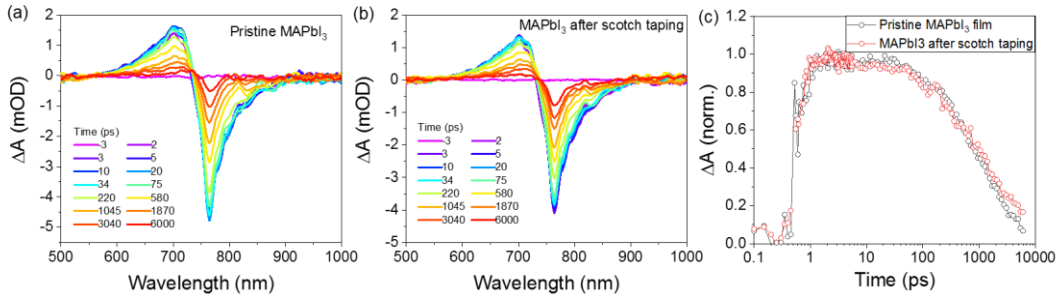

**Figure S4.** Transient absorption spectra for the (a) pristine (as-fabricated) MAPbI<sub>3</sub> film, (b) MAPbI<sub>3</sub> after scotch taping in vacuum, and (c) TA kinetics at 760 nm under excitation at 800 nm.

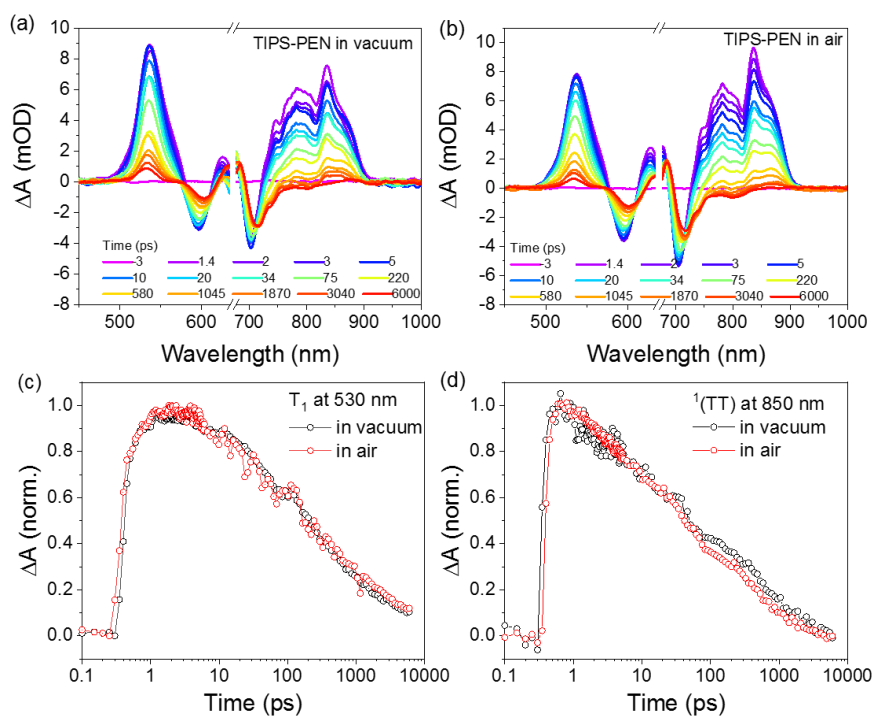

**Figure S5.** Transient absorption spectra for the TIPS-pentacene film (a) in vacuum and (b) in air under excitation at 650 nm. TA kinetics in vacuum and air at (c) 530 nm ( $T_1$ ) and (d) 850 nm ( $^1(TT)$ ).

## References

- (1) Gao, Y. *Mater. Sci. Eng. R Rep* **2010**, *68*, 39.
- (2) Liu, F.; Shi, R.; Wang, Z.; Weng, Y.; Che, C.-M.; Chen, Y., *Angew. Chem.* **2019**, *131*, 11917.
- (3) Tauc, J.; Grigorovici, R.; Vancu, A. *Phys. Status Solidi B* **1966**, *15*, 627.
- (4) Wood, D. L.; Tauc, J. *Phys. Rev. B* **1972**, *5*, 3144.
